# Supplementary material for: Molecular characteristics of BRCA1/2 and PALB2 mutations in pancreatic ductal adenocarcinoma
Source: PubMed Central journal article supplement — ESMO Open. 2020 Nov 23;5(6):e000942. doi: 10.1136/esmoopen-2020-000942 (PMC7684832; doi:10.1136/esmoopen-2020-000942), 2020-11-23
Supplement: esmoopen-2020-000942supp001.pdf [file esmoopen-2020-000942supp001.pdf]

Suppl. Table 1:

| Test        | ALL CASES |         |          |          | MSS CASES |         |          |          |
|-------------|-----------|---------|----------|----------|-----------|---------|----------|----------|
|             | BRCA-MT   | BRCA-WT | P-value  | Q-value  | BRCA-MT   | BRCA-WT | P-value  | Q-value  |
| NGS-KRAS    | 83.1%     | 83.7%   | 0.845804 | 1        | 83.2%     | 84.0%   | 0.812061 | 1        |
| NGS-TP53    | 59.3%     | 72.8%   | 0.00116  | 0.382696 | 60.2%     | 72.9%   | 0.00258  | 0.888251 |
| NGS-ARID1A  | 16.7%     | 20.5%   | 0.578909 | 1        | 11.8%     | 18.8%   | 0.298728 | 1        |
| NGS-SMAD4   | 15.0%     | 16.5%   | 0.656219 | 1        | 15.7%     | 16.6%   | 0.789639 | 1        |
| NGS-CDKN2A  | 12.9%     | 24.9%   | 0.005909 | 0.87284  | 11.5%     | 25.1%   | 0.002416 | 0.888251 |
| NGS-APC     | 6.5%      | 2.2%    | 0.008361 | 1        | 6.7%      | 2.1%    | 0.005821 | 1        |
| NGS-KMT2D   | 5.2%      | 3.2%    | 0.245993 | 1        | 3.3%      | 2.8%    | 0.7451   | 1        |
| NGS-KMT2C   | 5.1%      | 2.3%    | 0.123078 | 1        | 4.1%      | 2.3%    | 0.241405 | 1        |
| NGS-MSH2    | 4.8%      | 0.1%    | 3.17E-06 | 0.003274 | 0.0%      | 0.0%    | 1        | 1        |
| NGS-RNF43   | 3.8%      | 5.2%    | 0.519478 | 1        | 1.0%      | 4.8%    | 0.087144 | 1        |
| NGS-SETD2   | 3.7%      | 0.4%    | 0.00148  | 0.382696 | 2.9%      | 0.3%    | 0.007781 | 1        |
| NGS-STK11   | 3.3%      | 1.3%    | 0.088822 | 1        | 3.4%      | 1.3%    | 0.081486 | 1        |
| NGS-PIK3CA  | 3.2%      | 2.2%    | 0.350554 | 1        | 3.4%      | 2.1%    | 0.318105 | 1        |
| NGS-FLCN    | 2.8%      | 0.2%    | 0.002691 | 0.556405 | 0.0%      | 0.1%    | 1        | 1        |
| NGS-ASXL1   | 2.1%      | 0.8%    | 0.183591 | 1        | 0.0%      | 0.4%    | 1        | 1        |
| CNA-FGF19   | 2.0%      | 0.6%    | 0.124947 | 1        | 2.1%      | 0.6%    | 0.117118 | 1        |
| CNA-CCND1   | 2.0%      | 0.6%    | 0.156137 | 1        | 2.1%      | 0.7%    | 0.146966 | 1        |
| CNA-FGF3    | 2.0%      | 0.5%    | 0.11043  | 1        | 2.1%      | 0.5%    | 0.103624 | 1        |
| NGS-ARID2   | 2.0%      | 0.6%    | 0.141163 | 1        | 0.0%      | 0.5%    | 1        | 1        |
| NGS-MSH6    | 1.9%      | 0.4%    | 0.07058  | 1        | 1.0%      | 0.1%    | 0.161923 | 1        |
| NGS-AMER1   | 1.9%      | 0.5%    | 0.10963  | 1        | 2.0%      | 0.4%    | 0.089742 | 1        |
| NGS-ERBB3   | 1.9%      | 0.2%    | 0.025165 | 1        | 2.0%      | 0.1%    | 0.00994  | 1        |
| NGS-SUFU    | 1.9%      | 0.0%    | 0.0056   | 0.87284  | 1.0%      | 0.0%    | 0.083244 | 1        |
| NGS-KMT2A   | 1.9%      | 0.2%    | 0.037041 | 1        | 1.0%      | 0.1%    | 0.164634 | 1        |
| NGS-RB1     | 1.7%      | 1.3%    | 0.670029 | 1        | 0.9%      | 1.3%    | 1        | 1        |
| NGS-HNF1A   | 1.6%      | 0.4%    | 0.122349 | 1        | 0.0%      | 0.2%    | 1        | 1        |
| NGS-BRAF    | 1.6%      | 1.5%    | 0.701993 | 1        | 1.7%      | 1.4%    | 0.682693 | 1        |
| NGS-KDM6A   | 1.3%      | 3.5%    | 0.521778 | 1        | 1.3%      | 3.5%    | 0.516871 | 1        |
| NGS-PTCH1   | 1.2%      | 0.3%    | 0.237117 | 1        | 0.0%      | 0.1%    | 1        | 1        |
| NGS-BCOR    | 1.1%      | 0.8%    | 0.529436 | 1        | 1.2%      | 0.7%    | 0.447669 | 1        |
| NGS-NF1     | 1.1%      | 0.7%    | 0.513299 | 1        | 1.1%      | 0.7%    | 0.453359 | 1        |
| CNA-ADGRA2  | 1.0%      | 0.7%    | 0.510003 | 1        | 1.1%      | 0.7%    | 0.495869 | 1        |
| NGS-MITF    | 1.0%      | 0.5%    | 0.384692 | 1        | 1.1%      | 0.5%    | 0.372898 | 1        |
| NGS-FANCC   | 1.0%      | 0.1%    | 0.162526 | 1        | 0.0%      | 0.1%    | 1        | 1        |
| CNA-TRRAP   | 1.0%      | 0.9%    | 0.597512 | 1        | 1.1%      | 0.9%    | 0.583041 | 1        |
| CNA-HMGA2   | 1.0%      | 0.6%    | 0.445558 | 1        | 1.1%      | 0.6%    | 0.432708 | 1        |
| CNA-ZNF703  | 1.0%      | 0.3%    | 0.304205 | 1        | 1.1%      | 0.3%    | 0.29433  | 1        |
| CNA-BIRC3   | 1.0%      | 0.2%    | 0.237975 | 1        | 1.1%      | 0.2%    | 0.229883 | 1        |
| CNA-NFIB    | 1.0%      | 0.1%    | 0.165787 | 1        | 1.1%      | 0.1%    | 0.15989  | 1        |
| CNA-PIK3CA  | 1.0%      | 0.1%    | 0.127087 | 1        | 1.1%      | 0.1%    | 0.122463 | 1        |
| CNA-ALDH2   | 1.0%      | 0.0%    | 0.044236 | 1        | 1.1%      | 0.0%    | 0.042553 | 1        |
| CNA-SH2B3   | 1.0%      | 0.0%    | 0.044236 | 1        | 1.1%      | 0.0%    | 0.042553 | 1        |
| CNA-FGFR3   | 1.0%      | 0.2%    | 0.236537 | 1        | 1.1%      | 0.2%    | 0.228643 | 1        |
| CNA-MYC     | 1.0%      | 1.5%    | 1        | 1        | 1.0%      | 1.5%    | 1        | 1        |
| CNA-FGF4    | 1.0%      | 0.6%    | 0.446602 | 1        | 1.0%      | 0.6%    | 0.434155 | 1        |
| NGS-SMARCA4 | 1.0%      | 1.0%    | 1        | 1        | 1.0%      | 0.9%    | 0.612227 | 1        |
| NGS-PIK3R1  | 1.0%      | 0.2%    | 0.239246 | 1        | 1.0%      | 0.1%    | 0.161041 | 1        |
| NGS-CREBBP  | 1.0%      | 0.1%    | 0.164224 | 1        | 0.0%      | 0.1%    | 1        | 1        |
| NGS-WT1     | 1.0%      | 0.0%    | 0.043332 | 1        | 0.0%      | 0.0%    | 1        | 1        |
| NGS-PRKAR1A | 1.0%      | 0.2%    | 0.206381 | 1        | 1.0%      | 0.1%    | 0.163332 | 1        |
| NGS-BAP1    | 1.0%      | 0.4%    | 0.391887 | 1        | 1.0%      | 0.4%    | 0.353437 | 1        |
| NGS-FANCA   | 1.0%      | 0.2%    | 0.203289 | 1        | 0.0%      | 0.2%    | 1        | 1        |
| NGS-EP300   | 0.9%      | 0.4%    | 0.339923 | 1        | 1.0%      | 0.2%    | 0.234421 | 1        |
| NGS-PPP2R1A | 0.9%      | 0.1%    | 0.166306 | 1        | 1.0%      | 0.1%    | 0.123323 | 1        |
| NGS-U2AF1   | 0.9%      | 1.3%    | 1        | 1        | 1.0%      | 1.3%    | 1        | 1        |
| NGS-MEN1    | 0.9%      | 0.4%    | 0.338646 | 1        | 1.0%      | 0.3%    | 0.298661 | 1        |
| NGS-FANCF   | 0.9%      | 0.1%    | 0.167703 | 1        | 1.0%      | 0.1%    | 0.162411 | 1        |
| NGS-BCL9    | 0.9%      | 0.1%    | 0.128643 | 1        | 0.0%      | 0.0%    | 1        | 1        |
| NGS-FBXW7   | 0.9%      | 1.1%    | 1        | 1        | 0.0%      | 1.0%    | 0.624829 | 1        |
| NGS-PTEN    | 0.9%      | 0.9%    | 1        | 1        | 0.0%      | 0.8%    | 1        | 1        |
| NGS-ATM     | 0.8%      | 2.9%    | 0.26146  | 1        | 0.8%      | 2.9%    | 0.258434 | 1        |
| NGS-ERBB2   | 0.8%      | 0.3%    | 0.300751 | 1        | 0.0%      | 0.3%    | 1        | 1        |
| NGS-GNAS    | 0.8%      | 1.4%    | 1        | 1        | 0.8%      | 1.3%    | 1        | 1        |
| NGS-CTNNB1  | 0.8%      | 0.8%    | 1        | 1        | 0.8%      | 0.8%    | 0.619071 | 1        |
| NGS-MLH1    | 0.8%      | 0.2%    | 0.270631 | 1        | 0.8%      | 0.0%    | 0.042744 | 1        |
