# Supplementary material for: Molecular characteristics of BRCA1/2 and PALB2 mutations in pancreatic ductal adenocarcinoma
Source: PubMed Central journal article supplement — ESMO Open. 2020 Nov 23;5(6):e000942. doi: 10.1136/esmoopen-2020-000942 (PMC7684832; doi:10.1136/esmoopen-2020-000942), 2020-11-23
Supplement: esmoopen-2020-000942supp002.pdf [file esmoopen-2020-000942supp002.pdf]

Suppl. Table 2:

| Test        | ALL CASES |          |          |         | MSS CASES |          |          |         |
|-------------|-----------|----------|----------|---------|-----------|----------|----------|---------|
|             | PALB2-MT  | PALB2-WT | P-value  | Q-value | PALB2-MT  | PALB2-WT | P-value  | Q-value |
| NGS-KRAS    | 66.7%     | 83.5%    | 0.087707 | 1       | 64.3%     | 83.8%    | 0.062607 | 1       |
| NGS-ARID1A  | 50.0%     | 19.9%    | 0.181138 | 1       | 33.3%     | 18.3%    | 0.455178 | 1       |
| NGS-TP53    | 46.7%     | 74.3%    | 0.03203  | 1       | 42.9%     | 74.5%    | 0.012094 | 1       |
| NGS-CDKN2A  | 30.8%     | 24.4%    | 0.531532 | 1       | 25.0%     | 24.5%    | 1        | 1       |
| NGS-SMAD4   | 26.7%     | 17.2%    | 0.308192 | 1       | 28.6%     | 17.3%    | 0.282359 | 1       |
| NGS-PTEN    | 14.3%     | 0.8%     | 0.006794 | 1       | 15.4%     | 0.7%     | 0.004423 | 1       |
| NGS-RNF43   | 13.3%     | 5.1%     | 0.177686 | 1       | 7.1%      | 4.6%     | 0.487827 | 1       |
| NGS-KMT2D   | 13.3%     | 3.3%     | 0.087487 | 1       | 7.1%      | 2.9%     | 0.338407 | 1       |
| NGS-APC     | 13.3%     | 2.4%     | 0.050362 | 1       | 7.1%      | 2.4%     | 0.288455 | 1       |
| NGS-KMT2C   | 9.1%      | 2.4%     | 0.2405   | 1       | 0.0%      | 2.3%     | 1        | 1       |
| NGS-ASXL1   | 7.1%      | 0.8%     | 0.115699 | 1       | 0.0%      | 0.4%     | 1        | 1       |
| NGS-DICER1  | 7.1%      | 0.2%     | 0.035048 | 1       | 7.7%      | 0.2%     | 0.027587 | 1       |
| NGS-ATM     | 6.7%      | 3.2%     | 0.38672  | 1       | 7.1%      | 3.1%     | 0.358661 | 1       |
| NGS-RB1     | 6.7%      | 1.6%     | 0.21909  | 1       | 7.1%      | 1.5%     | 0.19868  | 1       |
| NGS-BRAF    | 6.7%      | 1.5%     | 0.202541 | 1       | 7.1%      | 1.4%     | 0.182974 | 1       |
| NGS-SMARCA4 | 6.7%      | 0.9%     | 0.135978 | 1       | 7.1%      | 0.9%     | 0.123851 | 1       |
| NGS-ARID2   | 6.7%      | 0.6%     | 0.093291 | 1       | 0.0%      | 0.4%     | 1        | 1       |
| NGS-AMER1   | 6.7%      | 0.5%     | 0.078778 | 1       | 7.1%      | 0.5%     | 0.069122 | 1       |
| NGS-MSH6    | 6.7%      | 0.4%     | 0.063163 | 1       | 0.0%      | 0.2%     | 1        | 1       |
| NGS-FANCA   | 6.7%      | 0.2%     | 0.030862 | 1       | 7.1%      | 0.1%     | 0.023435 | 1       |
| NGS-TSC2    | 6.7%      | 0.0%     | 0.012402 | 1       | 7.1%      | 0.0%     | 0.011733 | 1       |
